# Supplementary material for: Loss of N1-methylation of G37 in tRNA induces ribosome stalling and reprograms gene expression
Source: eLife journal article supplement (doi:10.7554/elife.70619), 2021-08-12
Supplement: supp [file Figure 3-figure supplement 1-source data 1.xlsx]

## Sheet: Methylation
Figure 3-figure supplement 1-source data 1: Related to Figure 3-figure supplement 1A. [3H] counts and converted numbers of the methylated tRNAs over time-course from plateau methylation of tRNAPro(UGG) and tRNAArg(CCG)
[3H] dpm after background subtraction	tRNAPro(UGG)							tRNAArg(CCG)
Time (min)	Rep 1	Rep 2	Rep 3				Time (min)	Rep 1	Rep 2	Rep 3
5	81000	50287	49114				5	38262	25462	26090
15	133716	60563	53011				15	65810	31878	29542
30	160724	67861	69482				30	76898	32169	32399
pmoles tRNA reacted
Time (min)	Rep 1	Rep 2	Rep 3				Time (min)	Rep 1	Rep 2	Rep 3
5	17.234	21.0494	20.5584				5	8.14085	10.658	10.9209
15	28.4502	25.3508	22.1896				15	14.0021	13.3437	12.3658
30	34.1966	28.4056	29.0841				30	16.3613	13.4655	13.5617
% tRNA reacted (corrected by filter effect, dilution effect and efficiency)
Time (min)	Rep 1	Rep 2	Rep 3	Average	SD		Time (min)	Rep 1	Rep 2	Rep 3	Average	SD
0	0	0	0	0	0		0	0	0	0	0	0
5	50.9067	72.428	70.7386	64.6911	11.9675		5	36.0702	55.0091	56.3659	49.1484	11.3463
15	84.0376	87.2285	76.3514	82.5391	5.59122		15	62.0402	68.8705	63.8237	64.9115	3.54269
30	101.011	97.7397	100.074	99.6086	1.6849		30	72.493	69.4992	69.9961	70.6628	1.60442
