# Supplementary material for: Loss of N1-methylation of G37 in tRNA induces ribosome stalling and reprograms gene expression
Source: eLife journal article supplement (doi:10.7554/elife.70619), 2021-08-12
Supplement: supp [file Figure 3-source data 1.xlsx]

## Sheet: Sheet1
	Figure 3-source data 1: Related to Figure 3A. Steady-state kinetic parameters kcat (s–1) and Km (µM) for aminoacylation of tRNAs. Each value is shown for the UGG, CGG, and GGG isoacceptors of E. coli tRNAPro, and for the CCG isoacceptor of E. coli tRNAArg, in the native-state, the m1G37-state, and the G37-state. The fold-change of kcat/Km of the value in the native- or m1G37-state relative to the…
	tRNA	State	kcat (s-1)	Km (µM)	kcat / Km (µM-1 s-1)	Fold change in kcat / Km (µM-1 s-1) relative to the G37-state
	Pro/UGG	Native	2.58 ± 0.08	0.64 ± 0.09	4.0 ± 0.58	10
		m1G37	2.85 ± 0.16	0.71 ± 0.16	4.0 ± 0.93	10
		G37	2.16 ± 0.14	5.36 ± 0.69	0.40 ± 0.06	1
	Pro/CGG	m1G37	1.11 ± 0.08	1.47 ± 0.31	0.76 ± 0.17	3.5
		G37	1.06 ± 0.10	4.89 ± 0.94	0.22 ± 0.05	1
	Pro/GGG	m1G37	2.74 ± 0.13	0.96 ± 0.20	2.9 ± 0.61	6.5
		G37	2.64 ± 0.06	6.02 ± 0.33	0.44 ± 0.03	1
	Arg/CCG	Native	1.62 ± 0.08	0.76 ± 0.11	2.1 ± 0.33	14.3
		m1G37	1.56 ± 0.05	1.88 ± 0.28	0.83 ± 0.13	5.6
		G37	0.33 ± 0.02	2.22 ± 0.35	0.15 ± 0.03	1
