# Supplementary material for: Loss of N1-methylation of G37 in tRNA induces ribosome stalling and reprograms gene expression
Source: eLife journal article supplement (doi:10.7554/elife.70619), 2021-08-12
Supplement: supp [file Figure 3-source data 2.xlsx]

## Sheet: Sheet1
	Figure 3-source data 2: Related to Figure 3B. Single-turnover kobs values for the overall peptide-bond formation of tRNAs at the A site. Each value is shown for the UGG, the CGG, and the GGG isoacceptors of E. coli tRNAPro, and for the CCG isoacceptor of E. coli tRNAArg, in the m1G37-state and the G37-state. The codon-anticodon pair tested is indicated in the cartoon on the top of each column. Th…
	Dipeptide bond formation	Pro	Pro	Pro	Pro	Pro	Pro	Pro	Arg
	Anticodon (5' to 3')	UGG	UGG	UGG	UGG	CGG	GGG	GGG	CCG
	Codon (3' to 5')	ACC	CCC	GCC	UCC	GCC	CCC	UCC	GGC
	kobs (m1G37)	20.1 ± 1.2	14.5 ± 1.8	14.0 ± 2.2	14.4 ± 2.1	17.8 ± 3.1	19.1 ± 1.9	23.1 ± 4.7	13.9 ± 0.9
	kobs (G37)	20.2 ± 2.4	1.01 ± 0.3	12.7 ± 3.0	13.1 ± 1.9	19.4 ± 2.9	18.0 ± 2.1	21.7± 3.8	0.97 ±0.1
	Fold change G37/m1G37	1 / 1.0	1 / 14.4	1 / 1.1	1 / 1.1	1 / 0.92	1 / 1.1	1 / 1.1	1 / 14.3
