# Supplementary material for: Loss of N1-methylation of G37 in tRNA induces ribosome stalling and reprograms gene expression
Source: eLife journal article supplement (doi:10.7554/elife.70619), 2021-08-12
Supplement: supp [file Figure 4-source data 4.xlsx]

## Sheet: ProUGG
Figure 4-source data 4: Related to Figure 4A. Quantification of Northern blot.
Pro(UGG)
Replicate 1		Intensity	Int-BG	Sum	% charged			Replicate 2		Intensity	Int-BG	Sum	% charged			Replicate 3		Intensity	Int-BG	Sum	% charged		BG= Background
m1G37+	charged	207.533	159.461	195.582	81.5315			m1G37+	charged	216.324	172.04	218.09	78.8849			m1G37+	charged	175.021	116.915	129.404	90.3488
	Uncharged	84.193	36.121						Uncharged	90.334	46.05						Uncharged	70.595	12.489
m1G37−	charged	187.888	139.816	201.526	69.3786			m1G37−	charged	220.413	176.129	267.007	65.9642			m1G37−	charged	210.42	152.314	221.306	68.8251
	Uncharged	109.782	61.71						Uncharged	135.162	90.878						Uncharged	127.098	68.992
ProS	charged	144.147	96.075	117.405	81.8321			ProS	charged	150.996	106.712	136.942	77.925			ProS	charged	153.091	94.985	109.993	86.3555
	Uncharged	69.402	21.33						Uncharged	74.514	30.23						Uncharged	73.114	15.008
	BG	48.072	0						BG	44.284	0						BG	58.106	0
						Average % charged
						% charged	STDEVP
					+	83.5884	4.90093
					−	68.056	1.49628
					− (ProS)	82.0375	3.44481

## Sheet: ArgCCG
Figure 4-source data 4: Related to Figure 4A. Quantification of Northern blot.
Arg(CCG)
Replicate 1								Replicate 2								Replicate 3							BG= Background
		Intensity	Intensity-BG	Total	% Charged					Intensity	Intensity-BG	Total	% Charged					Intensity	Intensity-BG	Total	% charged
m1G37+	charged	1451.94	905.83	1224.96	73.9478			m1G37+	charged	1467.31	916.039	1193.1	76.7783			m1G37+	charged	3111.97	2425.54	3360.85	72.1706
	Uncharged	865.244	319.129						Uncharged	828.33	277.057						Uncharged	1621.73	935.304
m1G37−	charged	1330.24	784.128	1277.48	61.3807			m1G37−	charged	1362.42	811.152	1286.39	63.0566			m1G37−	charged	2546.82	1860.39	3027.15	61.457
	Uncharged	1039.47	493.354						Uncharged	1026.51	475.236						Uncharged	1853.18	1166.75
ArgS	charged	1445.37	899.257	1230.07	73.106			ArgS	charged	1532.54	981.266	1296.17	75.705			ArgS	charged	2895.68	2209.25	3102.75	71.2029
	Uncharged	876.931	330.816						Uncharged	866.178	314.905						Uncharged	1579.93	893.504
	Background	546.115							Background	551.273							Background	686.429
							% charged
								Set I	Set II	Set III	Average	STDEVP
							+	73.9478	76.7783	72.1706	74.2989	1.89741
							−	61.3807	63.0566	61.457	61.9648	0.772639
							− (ArgS)	73.106	75.705	71.2029	73.3379	1.84529

## Sheet: TyrQUA
Figure 4-source data 4: Related to Figure 4A. Quantification of Northern blot.
Tyr(QUA)
																					BG= Background
Replicate 1		Intensity	Int-BG	Sum	% charged		Replicate 2		Intensity	Int-BG	Sum	% charged		Replicate 3		Intensity	Int-BG	Sum	% charged
m1G37+	charged	58674.8	46301.1	58513.1	79.1294		m1G37+	charged	47706.3	35934.4	45854.5	78.3661		m1G37+	charged	46670.2	38594.8	51064.1	75.5811
	Uncharged	24585.7	12212					Uncharged	21692	9920.14					Uncharged	20544.7	12469.3
m1G37−	charged	55310.9	42937.2	51395.2	83.5433		m1G37−	charged	51777.4	40005.5	49929.1	80.1247		m1G37−	charged	40486	32410.5	40656.6	79.7177
	Uncharged	20831.7	8457.97					Uncharged	21695.4	9923.55					Uncharged	16321.5	8246.1
	Background	12373.7	0					Background	11771.9	0					Background	8075.42	0
							Average % charged
							% charged	STDEVP
						+	77.6922	1.52497
						−	81.1286	1.71552
