# Supplementary material for: Loss of N1-methylation of G37 in tRNA induces ribosome stalling and reprograms gene expression
Source: eLife journal article supplement (doi:10.7554/elife.70619), 2021-08-12
Supplement: supp [file Figure 4-source data 5.xlsx]

## Sheet: ProUGG
Figure 4-source data 5: Related to Figure 4C. [3H] counts and converted numbers of the aminoacylated tRNAs over time-course from charging assay using E. coli cell lysates.
Lysate Charging tRNAPro(UGG)
[3H] dpm after background subtraction	trm5+						trm5−
Time (min)	Rep 1	Rep 2	Rep 3	Average	SD		Rep 1	Rep 2	Rep 3	Average	SD
1	707	529	589	608.333	90.5612		589	634	644	622.333	29.2973
2	1534	1215	1255	1334.67	173.782		959	999	1335	1097.67	206.507
4	2438	2189	1977	2201.33	230.747		1774	1861	2317	1984	291.649
pmoles tRNA reacted			Time (min)	Average	SD				Time (min)	Average	SD
			1	0.0368687	0.00548856				1	0.0377172	0.0017756
			2	0.0808889	0.0105323				2	0.0665253	0.0125156
			4	0.133414	0.0139847				4	0.120242	0.0176757
pmoles tRNA reacted (corrected by filter effect, dilution effect and efficiency)			Time (min)	Average	SD				Time (min)	Average	SD
			0	0	0				0	0	0
			1	1.2904	0.1921				1	1.3201	0.0621458
			2	2.83111	0.368629				2	2.32838	0.438046
			4	4.66949	0.489464				4	4.20848	0.618649

## Sheet: ArgCCG
Figure 4-source data 5: Related to Figure 4C. [3H] counts and converted numbers of the aminoacylated tRNAs over time-course from charging assay using E. coli cell lysates.
Lysate Charging tRNAArg(CCG)
[3H] dpm after background subtraction	trm5+						trm5−
Time (min)	Rep 1	Rep 2	Rep 3	Average	SD		Rep 1	Rep 2	Rep 3	Average	SD
1	294	505	463	420.667	111.689		642	394	602	546	133.147
2	959	1357	1037	1117.67	210.906		1160	1692	1433	1428.33	266.031
4	2160	2786	2686	2544	336.292		2179	2995	2732	2635.33	416.5
pmoles tRNA reacted			Time (min)	Average	SD				Time (min)	Average	SD
			1	0.0254949	0.006769				1	0.0330909	0.00806949
			2	0.0677374	0.0127822				2	0.0865657	0.0161231
			4	0.154182	0.0203813				4	0.159717	0.0252424
pmoles tRNA reacted (corrected by filter effect, dilution effect and efficiency)			Time (min)	Average	SD				Time (min)	Average	SD
			0	0	0				0	0	0
			1	0.892323	0.236915				1	1.15818	0.282432
			2	2.37081	0.447376				2	3.0298	0.564308
			4	5.39636	0.713346				4	5.5901	0.883485

## Sheet: TyrQUA
Figure 4-source data 5: Related to Figure 4C. [3H] counts and converted numbers of the aminoacylated tRNAs over time-course from charging assay using E. coli cell lysates.
Lysate Charging tRNATyr(QUA)
[3H] dpm after background subtraction	trm5+						trm5−
Time (min)	Rep 1	Rep 2	Rep 3	Average	SD		Rep 1	Rep 2	Rep 3	Average	SD
1	3759	2758	4022	3513	666.942		3312	3145	3429	3295.33	142.732
2	4902	4490	5379	4923.67	444.896		4306	4514	4898	4572.67	300.329
3	6911	5892	6453	6418.67	510.367		6411	5570	6291	6090.67	454.885
pmoles tRNA reacted			Time (min)	Average	SD				Time (min)	Average	SD
			1	0.0638727	0.0121262				1	0.0599152	0.00259512
			2	0.0895212	0.00808902				2	0.0831394	0.00546052
			3	0.116703	0.0092794				3	0.110739	0.00827064
pmoles tRNA reacted (corrected by filter effect, dilution effect and efficiency)			Time (min)	Average	SD				Time (min)	Average	SD
			0	0	0				0	0	0
			1	2.1078	0.400165				1	1.9772	0.085639
			2	2.9542	0.266938				2	2.7436	0.180197
			3	3.8512	0.30622				3	3.6544	0.272931
