# Supplementary material for: Loss of N1-methylation of G37 in tRNA induces ribosome stalling and reprograms gene expression
Source: eLife journal article supplement (doi:10.7554/elife.70619), 2021-08-12
Supplement: supp [file Figure 5-source data 1.xlsx]

## Sheet: nLuc leuL
Figure 5-source data 1: Related to Figure 5F. nLuc reporter assay with WT and mutant leuL leader sequences.
Repeat 1	trmD-KO (trm5)
	WT leuL (CUAx4)		Mutant leuL (UUAx4)
trm5	+	−	+	−
m1G37	+	−	+	−
mCherry	13293	9741	12923	6372
nLuc	122283	921138	324443	547838
nLuc/mCherry ratio	9.19905	94.563	25.1059	85.9758
Normalized ratio	1	10.2796	1	3.42453
							trmD-KO (trm5)
Repeat 2	trmD-KO (trm5)						WT leuL (CUAx4)		Mutant leuL (UUAx4)
	WT leuL (CUAx4)		Mutant leuL (UUAx4)			trm5	+	−	+	−
trm5	+	−	+	−		m1G37	+	−	+	−
m1G37	+	−	+	−		Repeat 1	1	10.2796	1	3.42453
mCherry	8982	5059	4267	3455		Repeat 2	1	15.2882	1	1.30926
nLuc	86105	741440	477232	505918		Repeat 3	1	8.91553	1	3.49437
nLuc/mCherry ratio	9.5864	146.559	111.843	146.431		Ave	1	11.4945	1	2.74272
Normalized ratio	1	15.2882	1	1.30926		SD	0	2.73977	0	1.01401
Repeat 3	trmD-KO (trm5)
	WT leuL (CUAx4)		Mutant leuL (UUAx4)
trm5	+	−	+	−
m1G37	+	−	+	−
mCherry	14154	7531	9710	5553
nLuc	202621	961181	342819	685081
nLuc/mCherry ratio	14.3155	127.63	35.3058	123.371
Normalized ratio	1	8.91553	1	3.49437
