# Supplementary material for: Loss of N1-methylation of G37 in tRNA induces ribosome stalling and reprograms gene expression
Source: eLife journal article supplement (doi:10.7554/elife.70619), 2021-08-12
Supplement: supp [file Figure 5-source data 2.xlsx]

## Sheet: WT ilvL(Pro-Pro)
Figure 5-source data 2: Related to Figure 5G. qPCR data for ilvG/ilvL.
Replicate 1				Replicate 2				Replicate 3
ilvG (ilvL as ref)				ilvG (ilvL as ref)				ilvG (ilvL as ref)				Final average
	Average	stdevp			Average	stdevp			Average	stdevp		ilvG/ilvL	stdevp
KO m1G37+	1	0.0400318		KO m1G37+	1	0.142909		KO m1G37+	1	0.0302768		1	0
KO m1G37-	2.7549	0.156555		KO m1G37-	3.85748	0.446169		KO m1G37-	2.64102	0.0335237		3.08447	0.548577
KO ProRS	1.93746	0.0794497		KO ProRS	1.45026	0.28624		KO ProRS	1.19923	0.179355		1.52898	0.306481
Replicate 1									Replicate 2									Replicate 3
		cq	conc	ilvG/ilvL	Relative to wt	Average	Stdevp				cq	conc	ilvG/ilvL	Relative to wt	Average	Stdevp				cq	conc	ilvG/ilvL	Relative to wt	Average	Sd
m1G37+	ilvL	21.62	0.560972			0.55476			m1G37+	ilvL	35.07	0.579285			0.604505			m1G37+	ilvL	21.23	0.472627			0.485615
	ilvL	21.6	0.565782							ilvL	35.2	0.55112							ilvL	21.03	0.51355
	ilvL	21.72	0.537525							ilvL	34.64	0.68311							ilvL	21.24	0.470668
	ilvG	25.15	0.49639	0.894785	0.948355					ilvG	33.14	0.719731	1.19061	1.16301					ilvG	24.38	0.584249	1.20311	0.982337
	ilvG	25	0.547452	0.986827	1.04591					ilvG	33.3	0.632443	1.04622	1.02196					ilvG	24.3	0.620098	1.27693	1.04261
	ilvG	25.06	0.526425	0.948925	1.00574	1	0.0400318			ilvG	33.58	0.504383	0.834372	0.815029	1	0.142909			ilvG	24.39	0.579917	1.19419	0.975052	1	0.0302768
m1G37-	ilvL	20.53	0.893406			0.788571			m1G37-	ilvL	30.07	3.93943			4.26402			m1G37-	ilvL	22.91	0.235276			0.240888
	ilvL	20.9	0.762858							ilvL	30.05	3.96975							ilvL	22.98	0.228536
	ilvL	21.07	0.70945							ilvL	29.51	4.8829							ilvL	22.68	0.258852
	ilvG	22.95	2.08682	2.64633	2.80476					ilvG	29.06	19.4525	4.56201	4.45624					ilvG	23.97	0.792756	3.29098	2.68707
	ilvG	22.89	2.17017	2.75203	2.91679					ilvG	29.28	16.2843	3.81901	3.73047					ilvG	24.01	0.7695	3.19443	2.60824
	ilvG	23.1	1.89218	2.3995	2.54316	2.7549	0.156555			ilvG	29.4	14.7795	3.46608	3.38573	3.85748	0.446169			ilvG	24	0.775249	3.2183	2.62773	2.64102	0.0335237
ProS	ilvL	23.04	0.305945			0.328417			ProS	ilvL	37.47	0.23082			0.258421			ProS	ilvL	22.53	0.275486			0.311433
	ilvL	22.65	0.361375							ilvL	37.08	0.268047							ilvL	22.05	0.336244
	ilvL	22.95	0.31793							ilvL	37	0.276396							ilvL	22.15	0.322568
	ilvG	24.82	0.615705	1.87477	1.98701					ilvG	34.26	0.291156	1.12667	1.10055					ilvG	24.46	0.550474	1.76755	1.4432
	ilvG	24.81	0.619737	1.88704	2.00002					ilvG	33.92	0.383215	1.48291	1.44853					ilvG	24.78	0.4338	1.39292	1.13731
	ilvG	24.95	0.565614	1.72224	1.82535	1.93746	0.0794497			ilvG	33.65	0.476645	1.84445	1.80169	1.45026	0.28624			ilvG	24.93	0.387971	1.24576	1.01716	1.19923	0.179355

## Sheet: Mut ilvL(Ala-Ala)
Figure 5-source data 2. Related to Figure 5G. qPCR data for ilvG/ilvL.
Replicate 1				Replicate 2				Replicate 3
ilvG(ilvL as ref)				ilvG (ilvL as ref)				ilvG (ilvLas ref)				ilvG(ilvL as ref)
	Average	stdevp			Average	stdevp			Average	stdevp			Average	stdevp
KO m1G37+	1	0.0314444		KO m1G37+	1	0.0285306		KO m1G37+	1	0.0384384		KO m1G37+	1	0
KO m1G37-	0.845659	0.145041		KO m1G37-	0.936156	0.134169		KO m1G37-	1.2942	0.167666		KO m1G37-	1.02534	0.193672
Replicate 1										Replicate 2											Replicate 3
		cq	conc	ilvG/ilvL	Relative to wt	Average	Stdevp					cq	conc	ilvG/ilvL	Relative to wt	Average	Stdevp					cq	conc	ilvG/ilvL	Relative to wt	Average	Stdevp
m1G37+	ilvL	24.26	0.510247			0.55194				m1G37+	ilvL	23.5	0.532291			0.551445				m1G37+	ilvL	23.63	0.43977			0.469502
	ilvL	24.12	0.564516								ilvL	23.51	0.52869								ilvL	23.55	0.462773
	ilvL	24.08	0.581056								ilvL	23.34	0.593354								ilvL	23.41	0.505962
	ilvG	22.73	0.516068	0.935008	1.03107						ilvG	22.83	0.533226	0.966962	1.00728						ilvG	22.82	0.84966	1.8097	1.04015
	ilvG	22.75	0.506527	0.917722	1.01201						ilvG	22.89	0.509248	0.92348	0.961989						ilvG	22.92	0.774539	1.6497	0.948188
	ilvG	22.81	0.47895	0.867758	0.956914	1	0.0314444				ilvG	22.8	0.545636	0.989466	1.03073	1	0.0285306				ilvG	22.85	0.826389	1.76014	1.01166	1	0.0384384
m1G37-	ilvL	23.42	0.935738			0.956443				m1G37-	ilvL	22.91	0.794455			0.771739				m1G37-	ilvL	25.29	0.152674			0.158406
	ilvL	23.4	0.949347								ilvL	23.01	0.74232								ilvL	25.26	0.155621
	ilvL	23.35	0.984243								ilvL	22.94	0.778441								ilvL	25.15	0.166922
	ilvG	22.17	0.870209	0.90984	1.00332						ilvG	22.58	0.645907	0.836951	0.871851						ilvG	23.93	0.304093	1.91971	1.10338
	ilvG	22.31	0.76365	0.798428	0.880461						ilvG	22.25	0.831901	1.07796	1.12291						ilvG	23.78	0.349389	2.20566	1.26773
	ilvG	22.63	0.566536	0.592337	0.653196	0.845659	0.145041				ilvG	22.67	0.602833	0.781136	0.813709	0.936156	0.134169				ilvG	23.59	0.416574	2.62979	1.51151	1.2942	0.167666
